# Supplementary material
Source: publisher figshare collection journal article supplement (https://acs.figshare.com/ndownloader/files/6486111)
Supplement: Supplementary file 1 [file 6486111]

# SUPPORTING INFORMATION

## Graphene Oxide Sorption Capacity Towards Elements over the Whole Periodic Table – a Comparative Study

Kateřina Klímová<sup>a</sup>, Martin Pumera<sup>b</sup>, Jan Luxa<sup>a</sup>, Ondřej Jankovský<sup>a</sup>, David Sedmidubský<sup>a</sup>,  
Stanislava Matějková<sup>c</sup> and Zdeněk Sofer<sup>a,\*</sup>

<sup>a</sup> Institute of Chemical Technology, Department of Inorganic Chemistry, 166 28 Prague  
6, Czech Republic. E-mail: zdenek.sofer@vscht.cz; Fax: +420 22431-0422

<sup>b</sup> Division of Chemistry & Biological Chemistry, School of Physical and Mathematical  
Sciences, Nanyang Technological University, Singapore, 637371, Singapore

<sup>c</sup> Institute of Organic Chemistry and Biochemistry AS CR, v.v.i., Flemingovo nam. 2, 166  
10 Prague 6, Czech Republic

SI contains following tables and images:

**Figure S1.** The XPS spectra of HUGO after sorption of vanadium in the form of  $\text{VO}_2^{2+}$  cation.

**Figure S2.** High resolution XPS spectra of C 1s peak for HUGO sample after sorption of  $\text{Fe}^{2+}$  and  $\text{Fe}^{3+}$  cations.

**Figure S3.** The X-ray diffractogram of HUGO after sorption of  $\text{Pb}^{2+}$ . The diffraction lines correspond to  $\text{PbSO}_4$ .

**Figure S4.** The EDS distribution maps of elements and corresponding SEM image of HUGO after sorption. The scale bar is 5  $\mu\text{m}$ .

**Figure S5.** The XPS spectra of HOGO after sorption of  $\text{Sn}^{2+}$  and  $\text{Sn}^{4+}$ . The images from upstairs show the XPS survey spectra. High resolution C 1s XPS spectra and high resolution 3d Sn spectra and X-ray diffractograms. The diffraction patterns corresponding to  $\text{SnO}_2$ .

**Figure S6.** The X-ray diffractogram of HOGO after sorption of  $\text{Pb}^{2+}$  sample and x-ray diffraction patterns of  $\text{PbSO}_4$ .

**Figure S7.** The EDS distribution maps of elements and corresponding SEM image of HOGO after sorption. Scale bar correspond to 5  $\mu\text{m}$ . The scale bar is 5  $\mu\text{m}$ .

**Table S1.** The results of deconvolution for XPS spectra of C 1s peak.

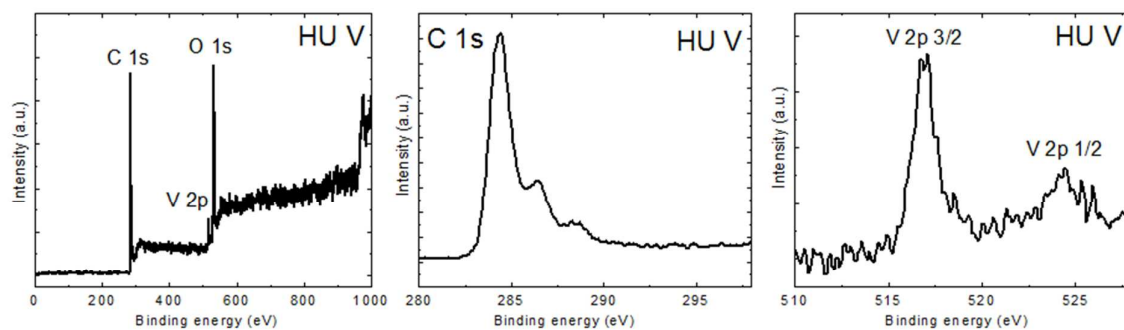

**Figure S1.** The XPS spectra of HUGO after sorption of vanadium in the form of  $\text{VO}_2^{2+}$  cation.

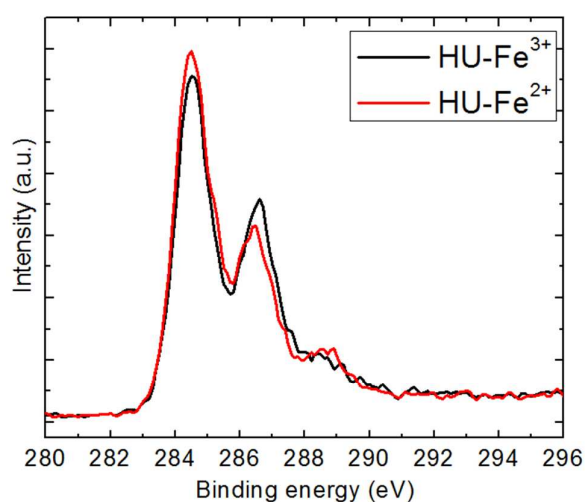

**Figure S2.** High resolution XPS spectra of C 1s peak for HUGO sample after sorption of  $\text{Fe}^{2+}$  and  $\text{Fe}^{3+}$  cations.

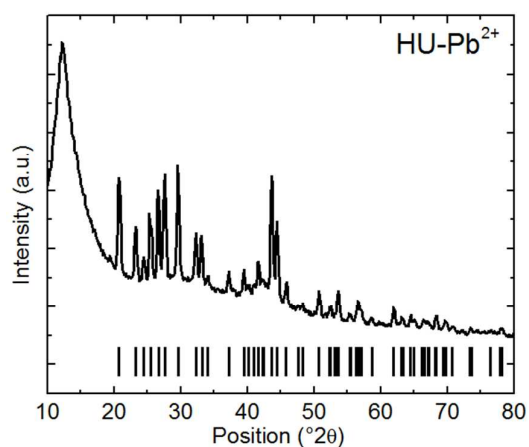

**Figure S3.** The X-ray diffractogram of HUGO after sorption of  $\text{Pb}^{2+}$ . The diffraction lines correspond to  $\text{PbSO}_4$ .

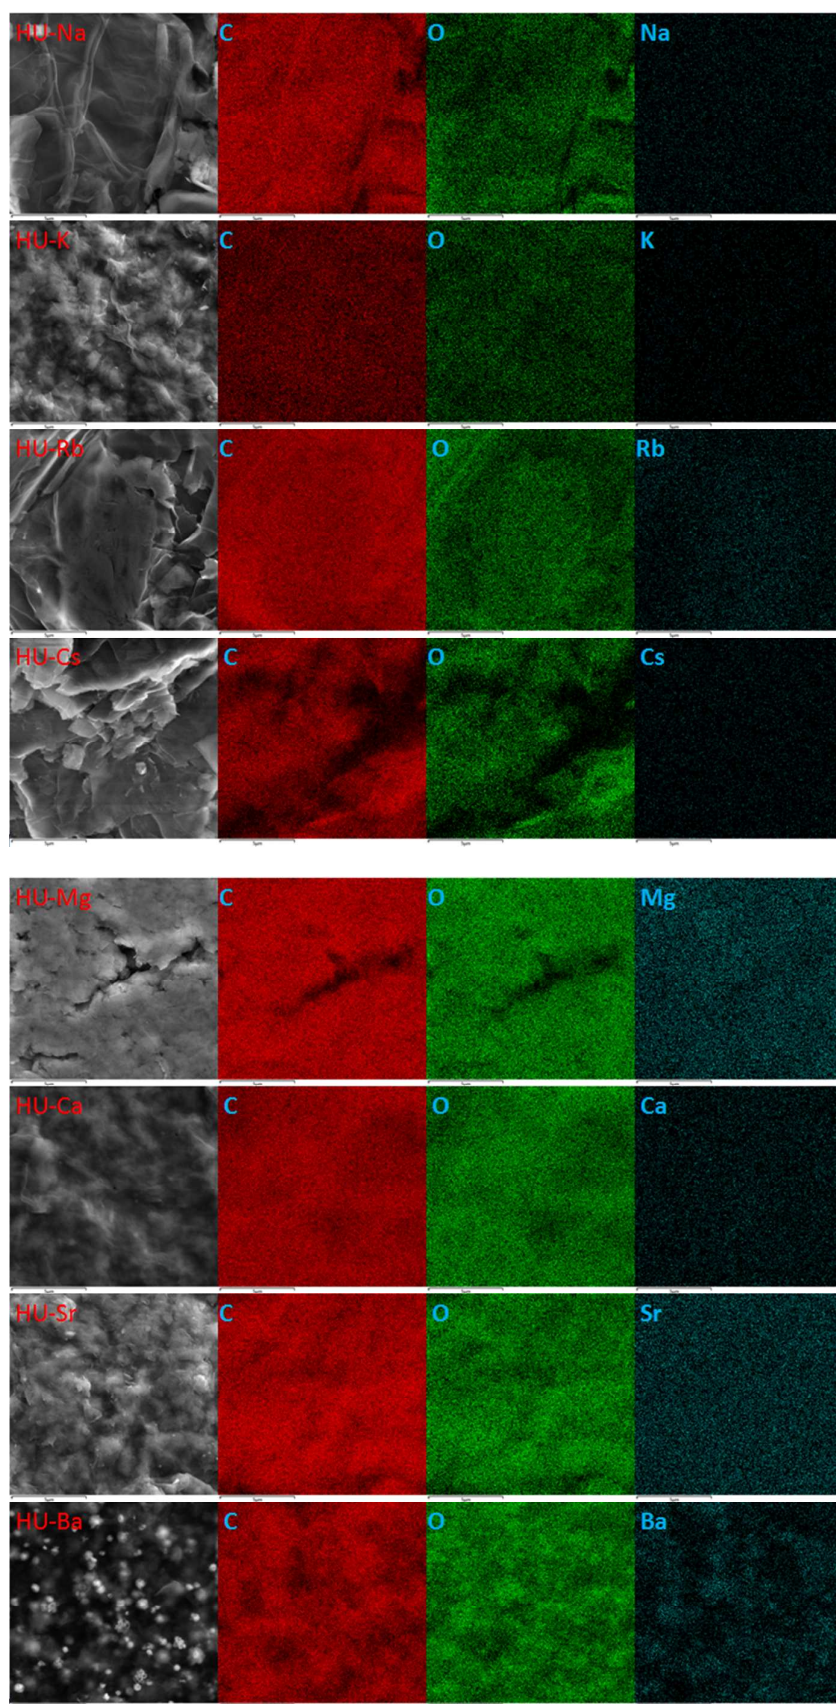



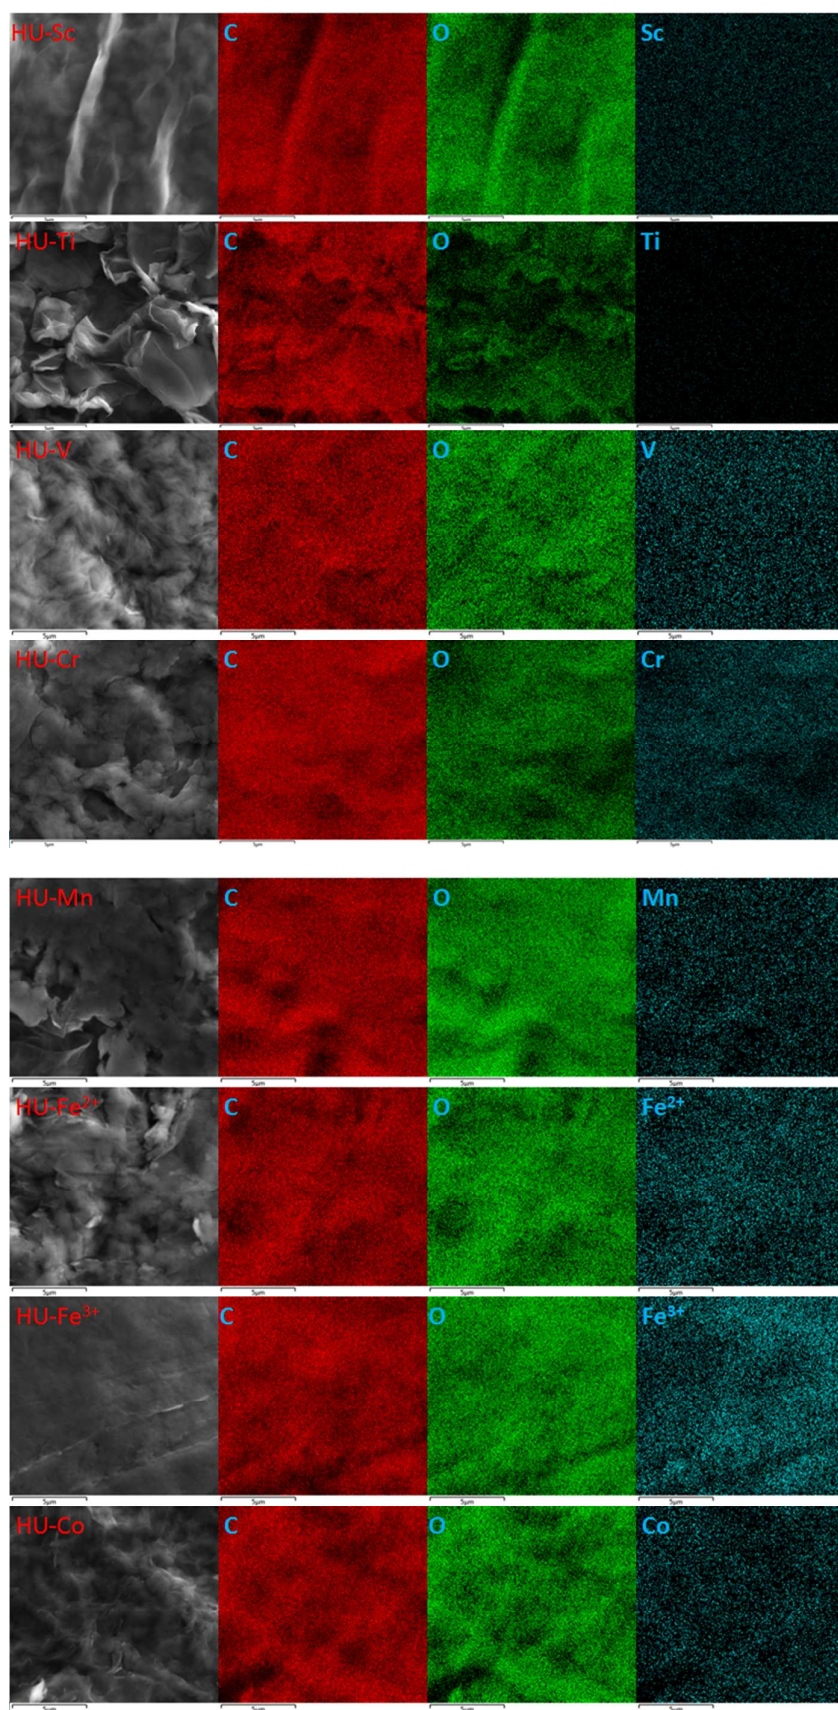



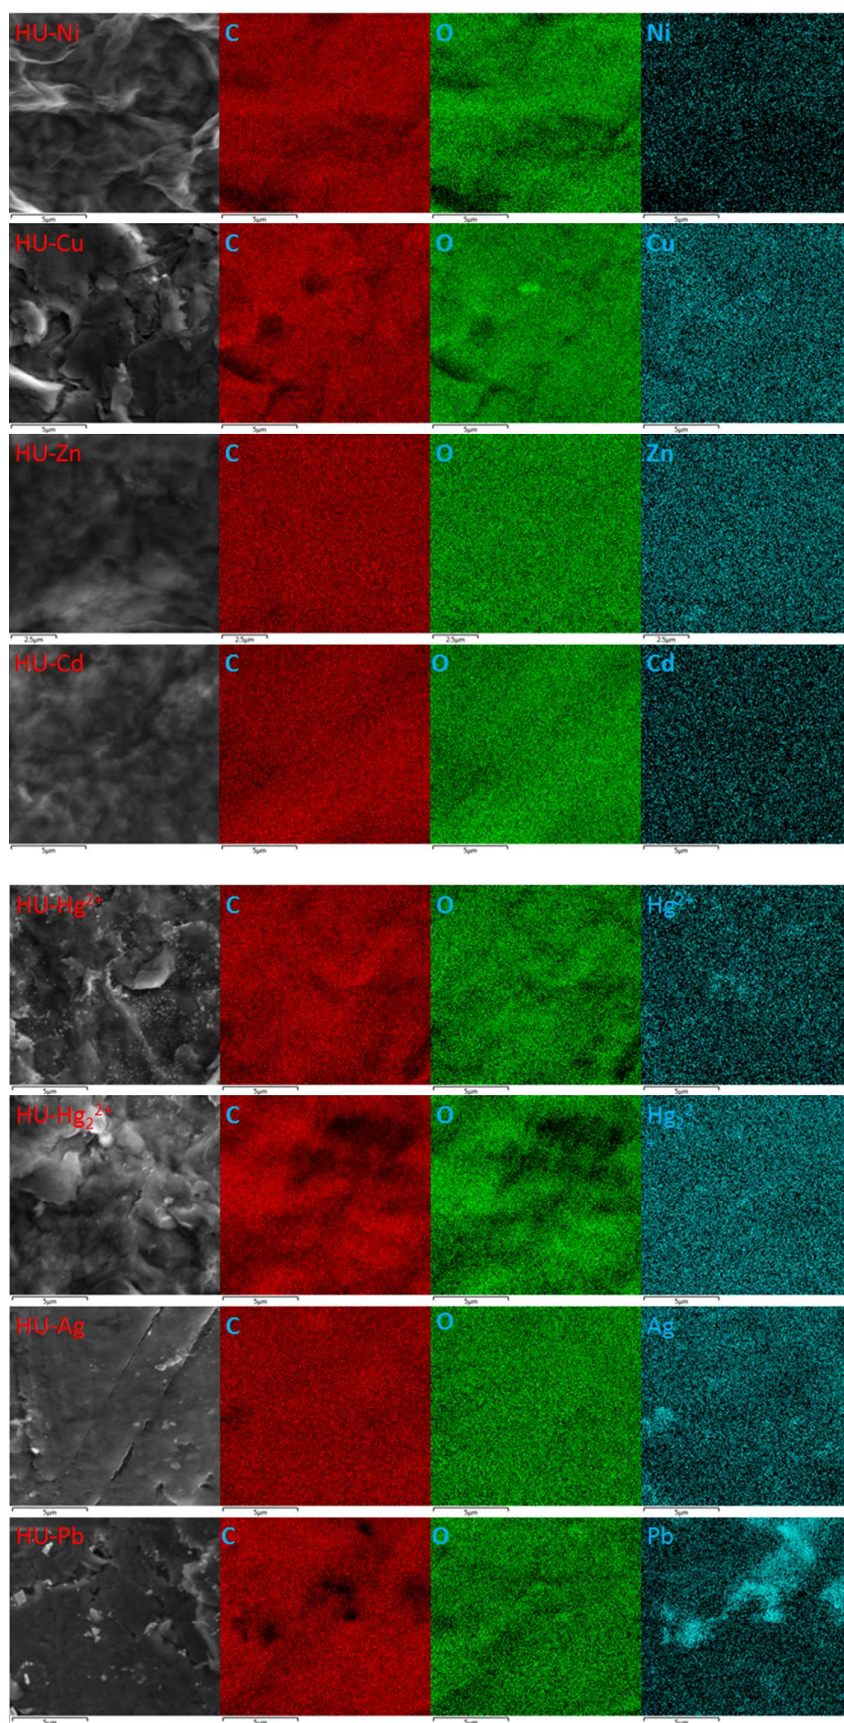

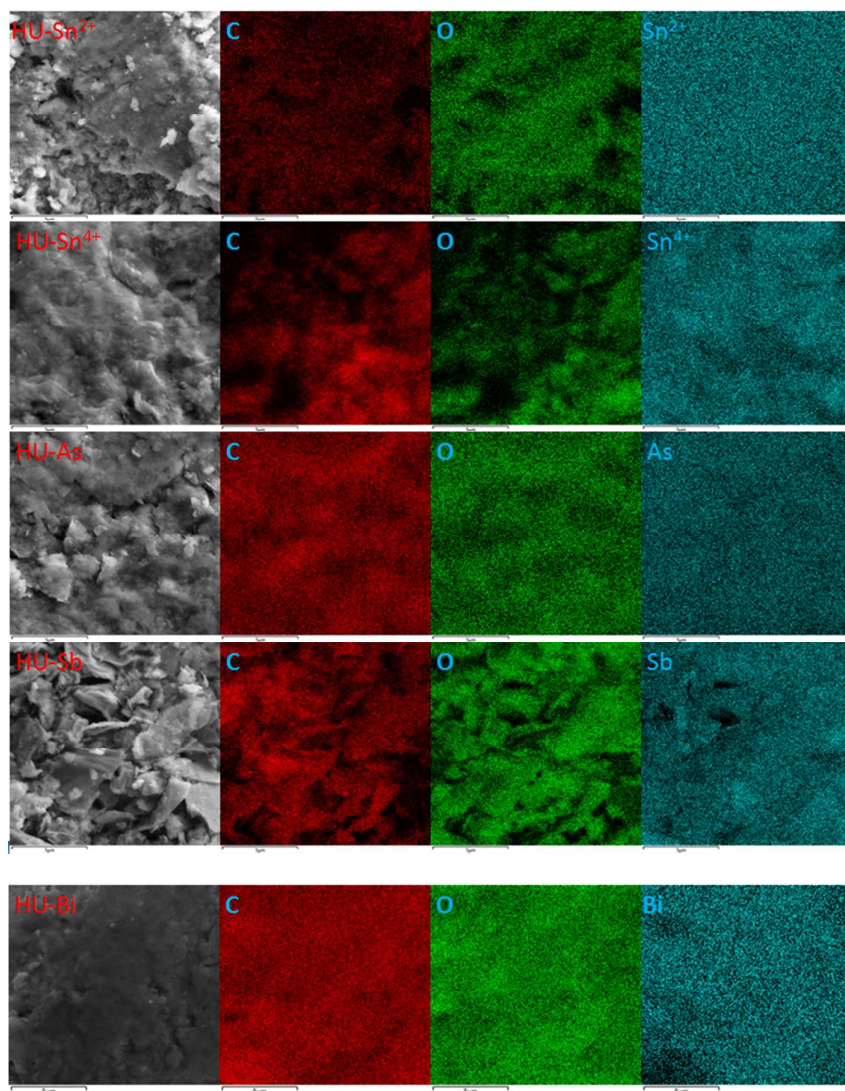

**Figure S4.** The EDS distribution maps of elements and corresponding SEM image of HUGO after sorption. The scale bar is 5  $\mu\text{m}$ .



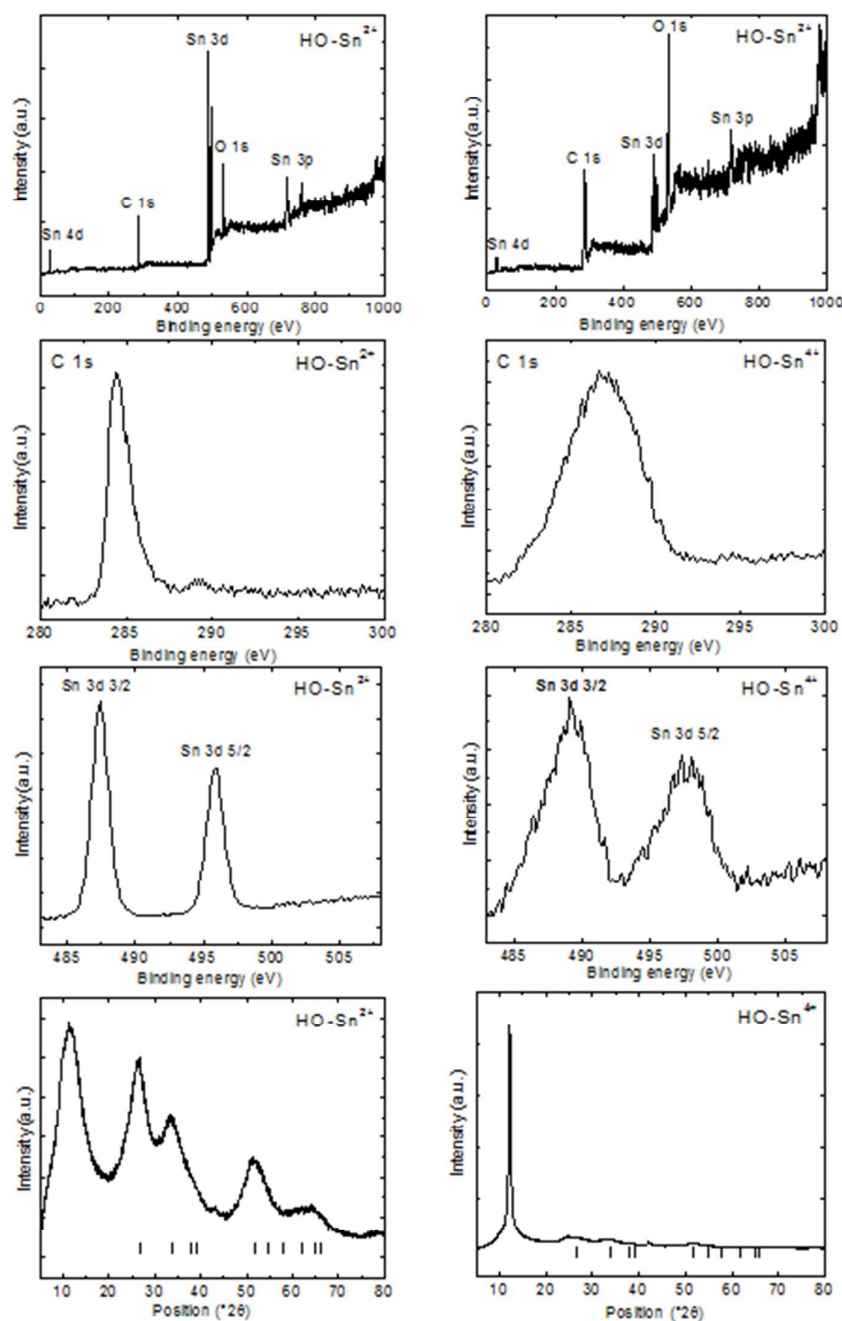

**Figure S5.** The XPS spectra of HOGO after sorption of  $\text{Sn}^{2+}$  and  $\text{Sn}^{4+}$ . The images from upstairs show the XPS survey spectra. High resolution C 1s XPS spectra and high resolution 3d Sn spectra and X-ray diffractograms. The diffraction patterns corresponding to  $\text{SnO}_2$ .



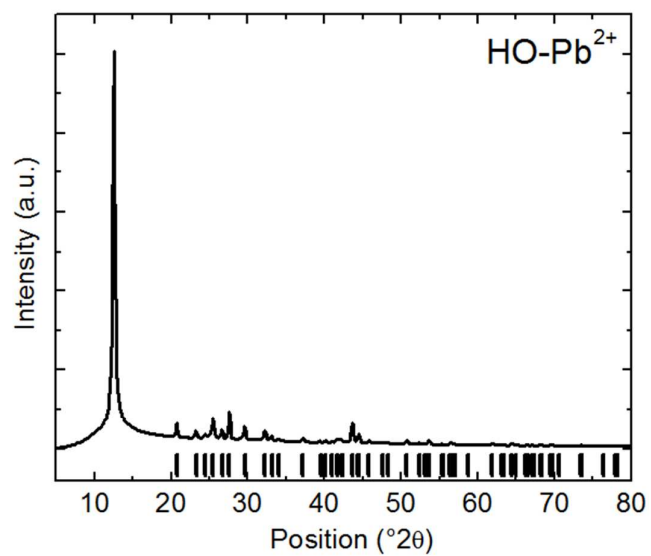

**Figure S6.** The X-ray diffractogram of HOGO after sorption of Pb<sup>2+</sup> sample and x-ray diffraction patterns of PbSO<sub>4</sub>.

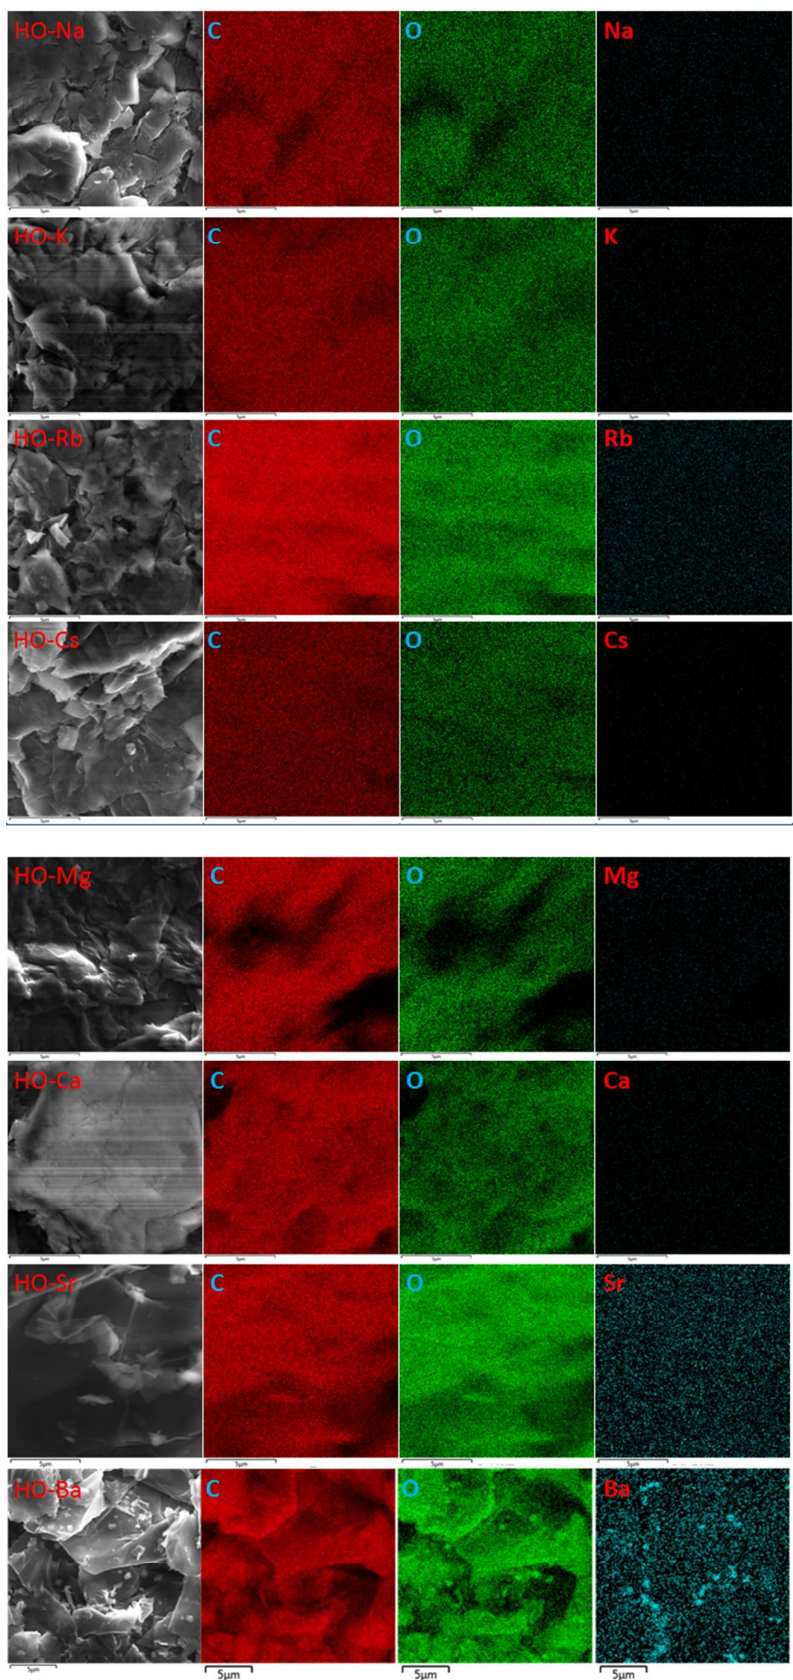

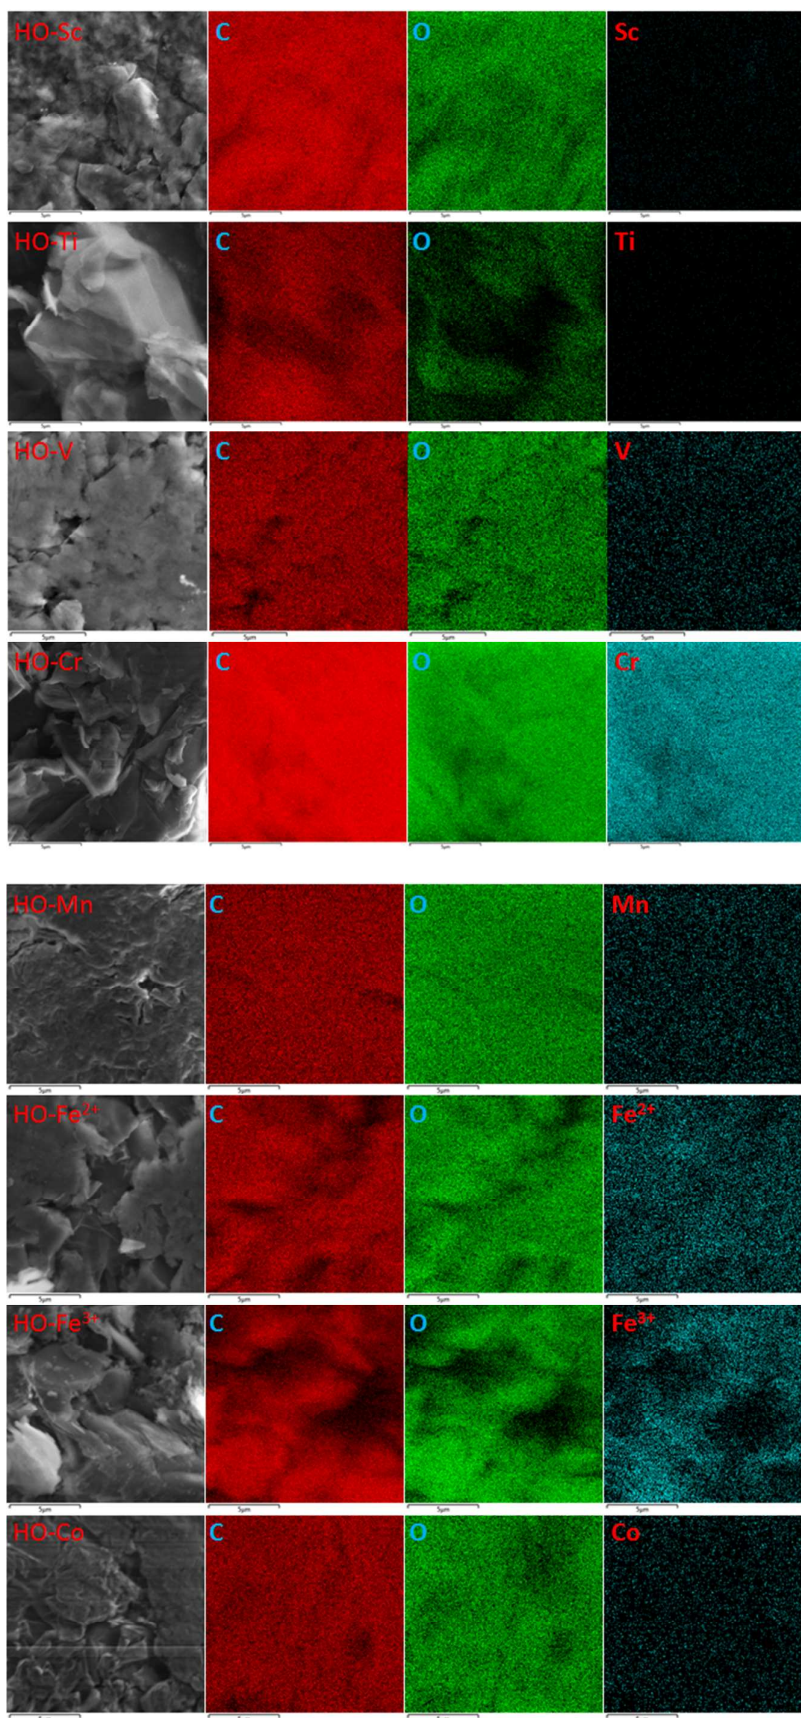



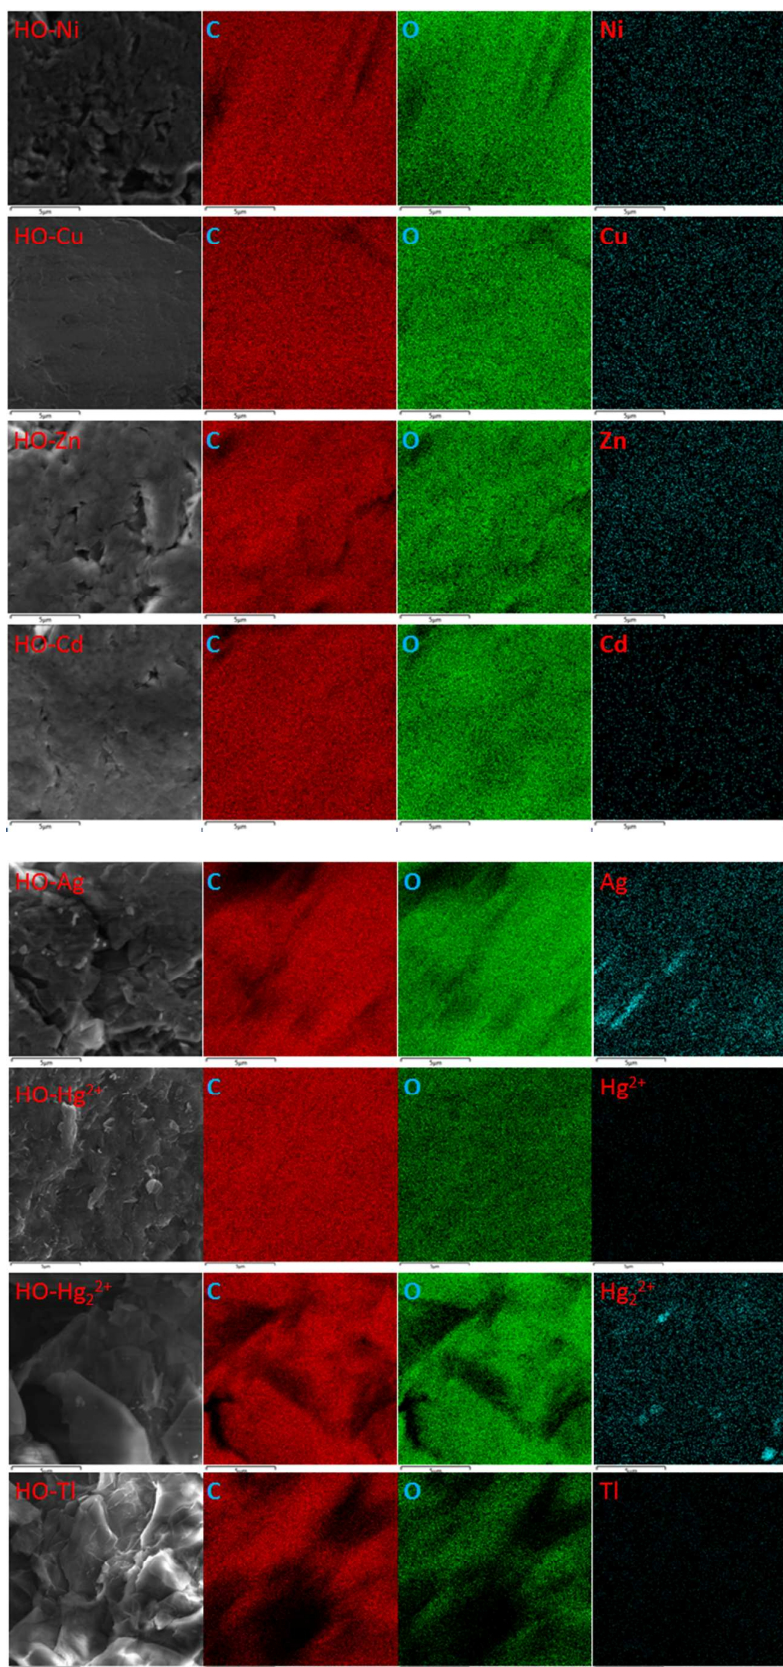

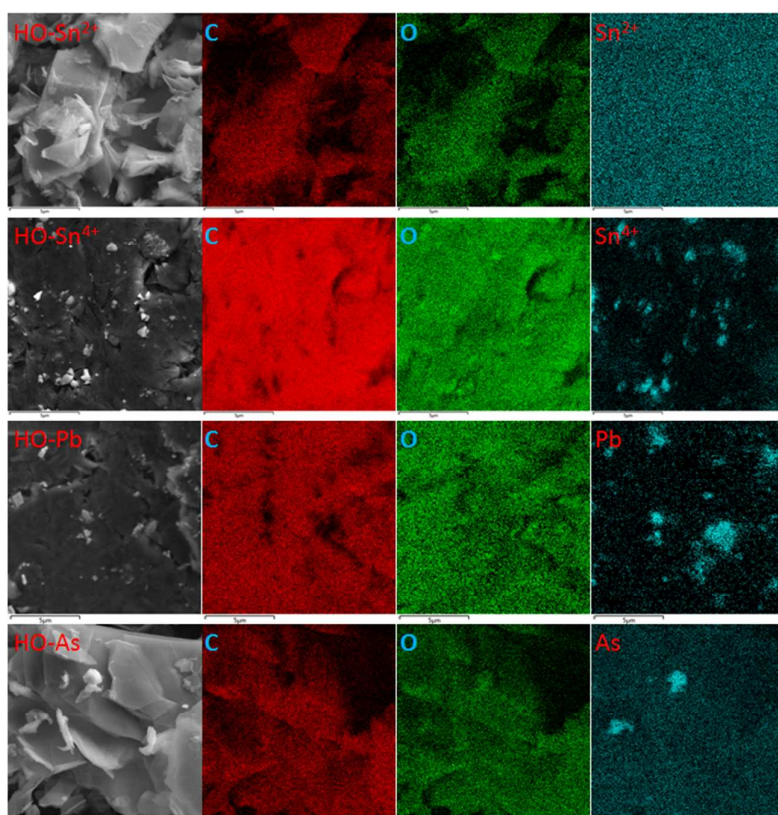

**Figure S7.** The EDS distribution maps of elements and corresponding SEM image of HOGO after sorption. Scale bar correspond to 5  $\mu\text{m}$ . The scale bar is 5  $\mu\text{m}$ .

**Table S1.** The results of deconvolution for XPS spectra of C 1s peak.

|           | HOGO | HUGO |
|-----------|------|------|
| C-C       | 11.2 | 8.5  |
| C=C       | 6.6  | 35.0 |
| C-O       | 35.4 | 17.3 |
| C=O       | 18.3 | 18.9 |
| O-C=O     | 12.4 | 12.2 |
| $\pi=\pi$ | 16.1 | 8.1  |
